# Supplementary material for: Facile Chemical Synthesis of Doped ZnO Nanocrystals Exploiting Oleic Acid
Source: PubMed Central journal article supplement (PMC7353420; doi:10.3390/nano10061150), 2020-06-11
Supplement: nanomaterials-10-01150-s001.pdf [file nanomaterials-10-01150-s001.pdf]

# Supporting Information

## Facile chemical synthesis of doped ZnO nanocrystals exploiting oleic acid

Sugata Barui<sup>1</sup>, Roberto Gerbaldo<sup>1</sup>, Nadia Garino<sup>1</sup>, Rosaria Brescia<sup>2</sup>, Francesco Laviano<sup>1</sup>, Valentina Cauda<sup>1</sup>,\*

<sup>1</sup> Department of Applied Science and Technology, Politecnico di Torino, Corso Duca degli Abruzzi 24, 10129 Turin, Italy; [sugata.barui@polito.it](mailto:sugata.barui@polito.it); [roberto.gerbaldo@polito.it](mailto:roberto.gerbaldo@polito.it); [nadia.garino@polito.it](mailto:nadia.garino@polito.it); [francesco.laviano@polito.it](mailto:francesco.laviano@polito.it)

<sup>2</sup> Electron Microscopy Facility, Center for Convergent Technologies, Istituto Italiano di Tecnologia (IIT), via Morego 30, 16163 Genoa, Italy; [rosaria.brescia@iit.it](mailto:rosaria.brescia@iit.it)

\* Correspondence: [valentina.cauda@polito.it](mailto:valentina.cauda@polito.it); Tel.: +39-011 090 7389

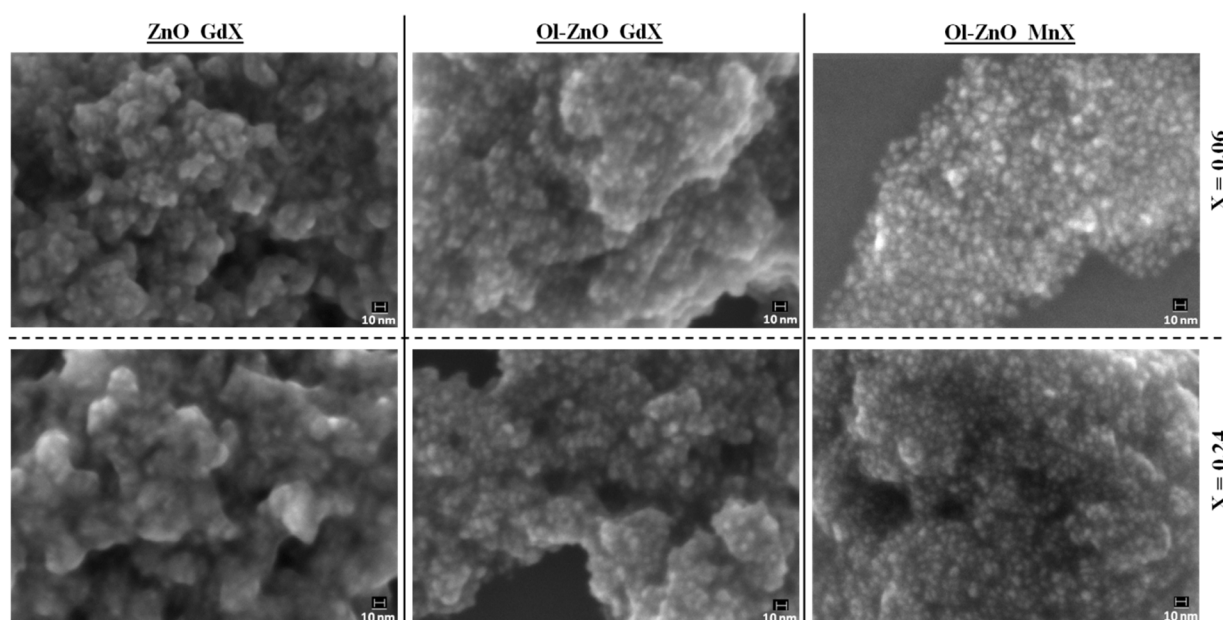

**Figure S1.** Field emission scanning electron microscopy (FESEM) images of Gd-doped ZnO-NCs synthesized either by Sol-gel method (ZnO\_GdX; left panels) or by oleic acid mediated coprecipitation method (Ol-ZnO\_GdX; middle panels) and Mn-doped ZnO-NCs synthesized by oleic acid mediated coprecipitation method (Ol-ZnO\_MnX; right panels) where X = 0.06, 0.24.

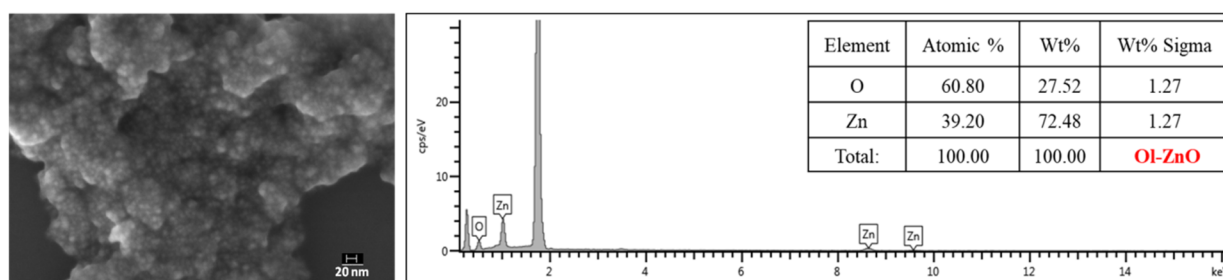

**Figure S2.** FESEM-Energy Dispersive Spectroscopic (EDS) analysis of Ol-ZnO NCs.

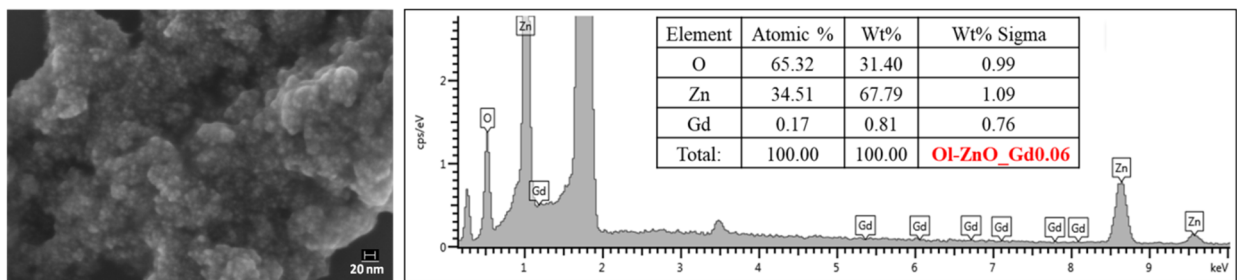

Figure S3. FESEM-Energy Dispersive Spectroscopic (EDS) analysis of OI-ZnO\_Gd0.06.

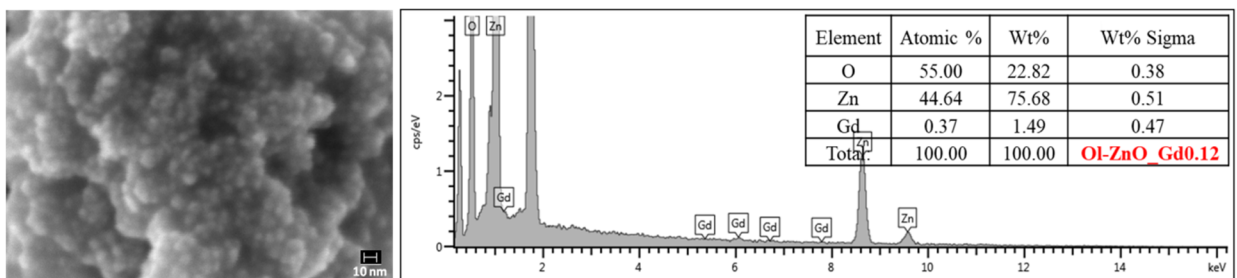

Figure S4. FESEM-Energy Dispersive Spectroscopic (EDS) analysis of OI-ZnO\_Gd0.12.

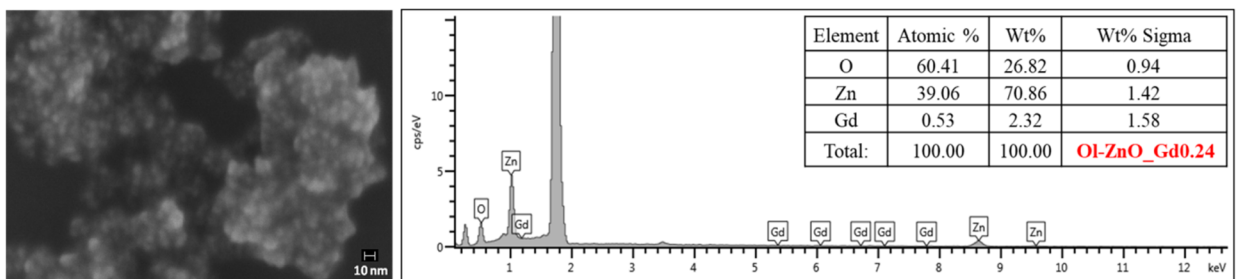

Figure S5. FESEM-Energy Dispersive Spectroscopic (EDS) analysis of OI-ZnO\_Gd0.24.

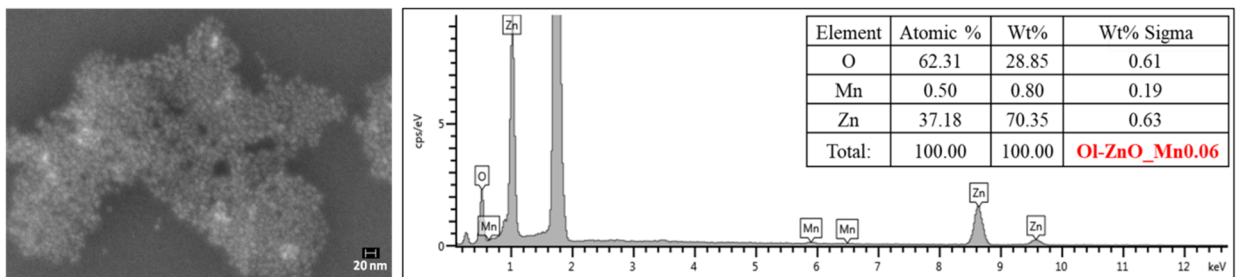

Figure S6. FESEM-Energy Dispersive Spectroscopic (EDS) analysis of OI-ZnO\_Mn0.06.

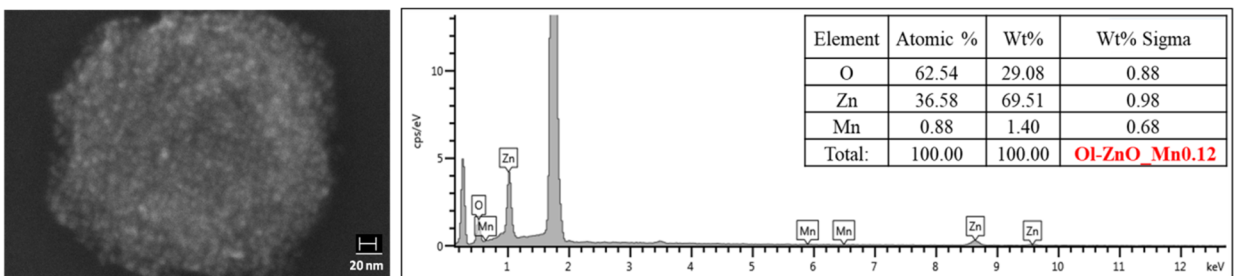

Figure S7. FESEM-Energy Dispersive Spectroscopic (EDS) analysis of OI-ZnO\_Mn0.12.

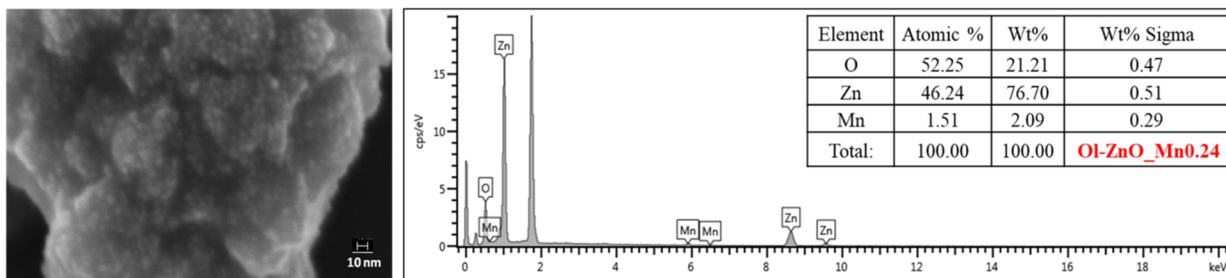

Figure S8. FESEM-Energy Dispersive Spectroscopic (EDS) analysis of Ol-ZnO\_Mn0.24.

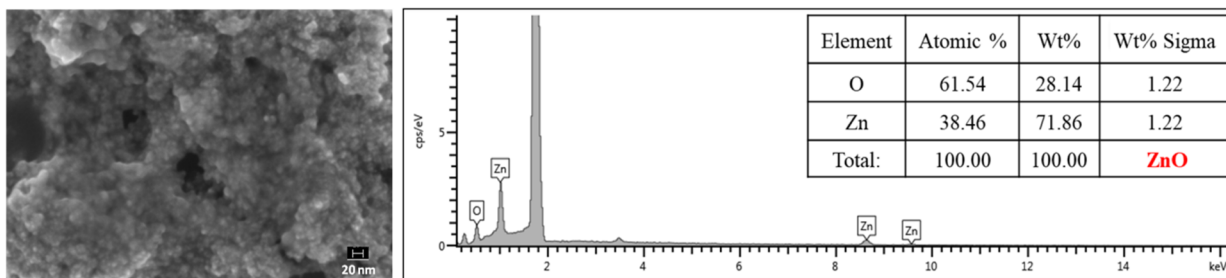

Figure S9. FESEM-Energy Dispersive Spectroscopic (EDS) analysis of ZnO-NCs.

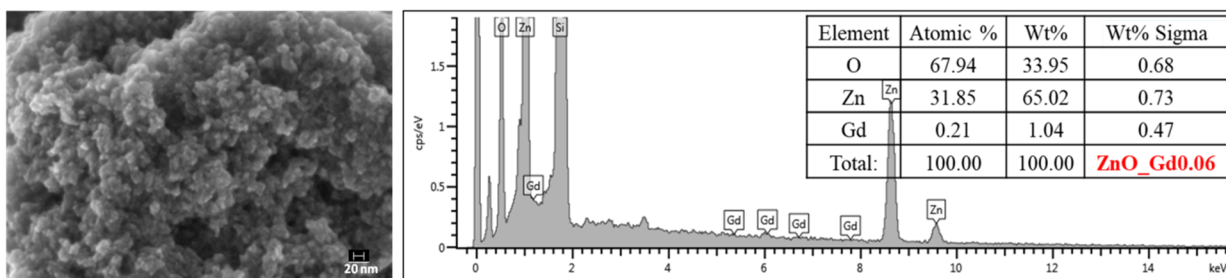

Figure S10. FESEM-Energy Dispersive Spectroscopic (EDS) analysis of ZnO\_Gd0.06.

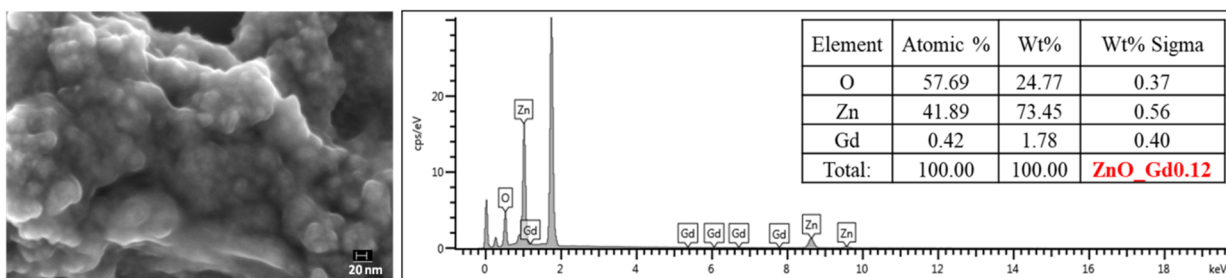

Figure S11. FESEM-Energy Dispersive Spectroscopic (EDS) analysis of ZnO\_Gd0.12.

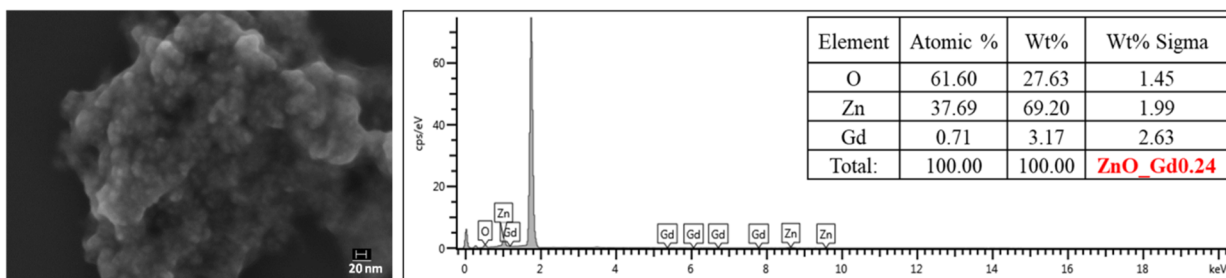

Figure S12. FESEM-Energy Dispersive Spectroscopic (EDS) analysis of ZnO\_Gd0.24.

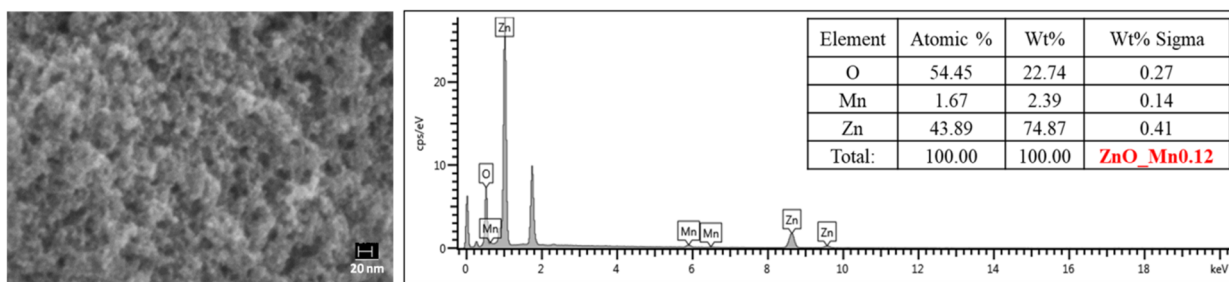

**Figure S13.** FESEM-Energy Dispersive Spectroscopic (EDS) analysis of ZnO\_Mn0.12.

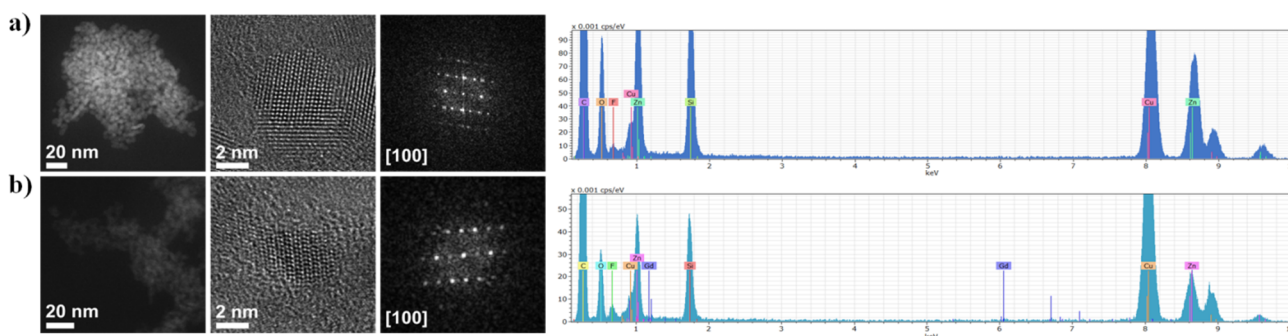

**Figure S14.** HAADF-STEM, HRTEM images with respective FFTs and STEM-EDS analysis of ZnO (a) and ZnO\_Gd0.24 (b).

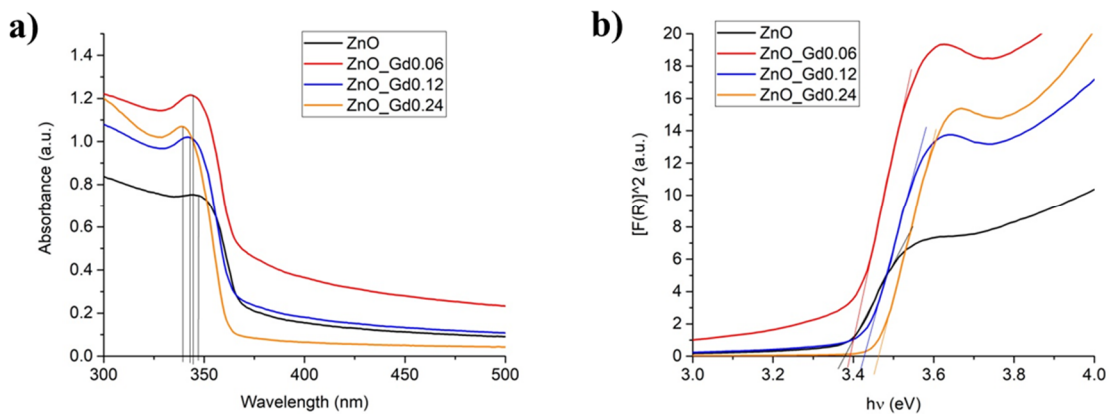

**Figure S15.** Characterization of the optical properties of Gd- doped ZnO-NCs synthesized by Sol-gel method (ZnO\_GdX where X = 0, 0.06, 0.12 and 0.24). (a) represents Ultraviolet-visible (UV-vis) absorption spectra and (b) represents optical band gaps ( $E_g$ ).

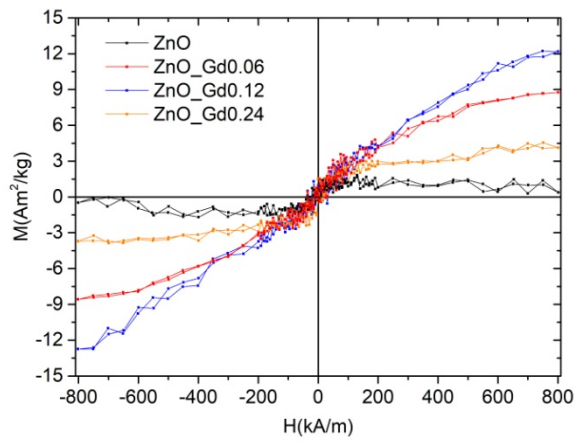

**Figure S16.** M-H curve, the measured RT magnetization curves for Gd- doped ZnO-NCs synthesized by Sol-gel method (ZnO\_GdX where X = 0, 0.06, 0.12 and 0.24).

**Table S1.** Analyzed absorption wavelength ( $\lambda$ ) and band gap values from UV-vis absorption spectra of Gd-doped ZnO-NCs synthesized by Sol-gel method.

|                | ZnO    | ZnO_Gd0.06 | ZnO_Gd0.12 | ZnO_Gd0.24 |
|----------------|--------|------------|------------|------------|
| $\lambda$ (nm) | 347.60 | 344.64     | 342.86     | 339.31     |
| Band gap (Eg)  | 3.37   | 3.39       | 3.43       | 3.46       |
